# Supplementary material
Source: Springer Nature journal article supplement (https://www.springermedizin.de/resource/supplementary/12943_2004_80_MOESM5_ESM.pdf/9553390)

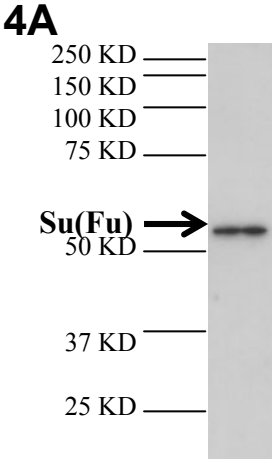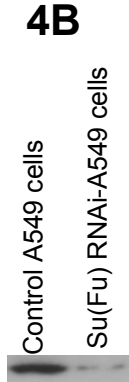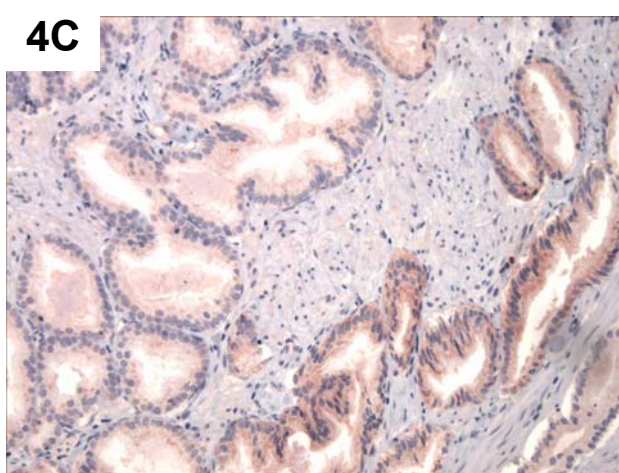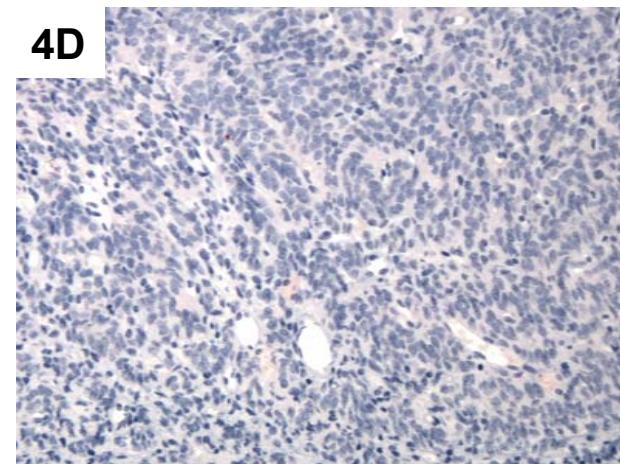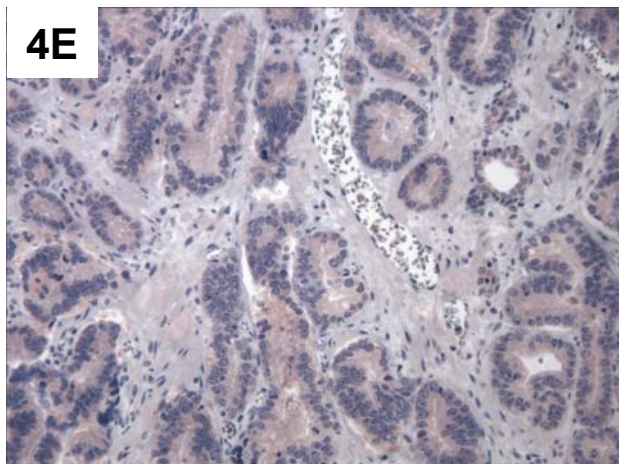

Supplement: MOESM5 [file 9553390]
